# Supplementary material for: Validation of the American Joint Committee on Cancer Eighth Edition Staging of Patients With Metastatic Cutaneous Melanoma Treated With Immune Checkpoint Inhibitors
Source: PubMed Central journal article supplement (PMC7944385; doi:10.1001/jamanetworkopen.2021.0980), 2021-03-09
Supplement: jamanetwopen-e210980-s001.pdf [file jamanetwopen-e210980-s001.pdf]

## Supplemental Online Content

Waninger JJ, Ma VT, Journey S, et al. Validation of the American Joint Committee on Cancer eighth edition staging of patients with metastatic cutaneous melanoma treated with immune checkpoint inhibitors. *JAMA Netw Open*. 2021;4(3):e210980. doi:10.1001/jamanetworkopen.2021.0980

**eTable 1.** OS and PFS Measures by AJCC Eighth Edition M category

**eTable 2.** Pairwise Comparisons of each AJCC Eighth Edition M category

**eTable 3.** Royston D Statistic of M Staging Models

**eFigure 1.** Kaplan-Meier Analysis of the OS and PFS in Patients With and Without Brain Metastases

**eFigure 2.** Kaplan-Meier Analysis of AJCC Eighth Edition M Category at ICI Initiation in Patients Who Received First-Line ICI

**eTable 4.** Pairwise Comparisons of Each AJCC Eighth Edition M Category for Patients Who Received First-Line ICI

**eFigure 3.** Kaplan-Meier Analysis of Patient OS and PFS by *BRAF* Status

**eFigure 4.** Kaplan-Meier Analysis Comparing the OS and PFS of Patients With and Without Liver Metastases

**eTable 5.** OS and PFS Measures for Patients With M1c and M1d Disease With and Without Liver Metastases

**eTable 6.** Pairwise Comparisons of Patients With M1c and M1d Disease With and Without Liver Metastases

**eFigure 5.** Comparison of Number of Metastatic Sites and LDH Level

**eTable 7.** Pairwise Univariable Analysis of LDH Stratified by Liver Involvement

**eTable 8.** OS and PFS Measures of Patients in the Proposed Staging Model

**eTable 9.** Pairwise Comparisons of Each Stratum in the Proposed Staging Model of Patients With Metastatic Cutaneous Melanoma

**eFigure 6.** Kaplan-Meier Analysis of Progression-Free Survival of the Proposed Staging Model of Patients With Metastatic Cutaneous Melanoma Incorporating LDH Levels and Liver Involvement

**eTable 10.** Clinical and Disease Characteristics of External Validation Cohort

**eTable 11.** OS Measures of External Validation Cohort

**eTable 12.** Pairwise Comparisons of Each Stratum in the New Staging Model Using an External Validation Cohort

This supplemental material has been provided by the authors to give readers additional information about their work.

**eTable 1.** OS and PFS Measures by AJCC Eighth Edition M category

|            | Subjects alive at 1 year (%) | Median Survival (months) | D-Stat (95% CI) |
|------------|------------------------------|--------------------------|-----------------|
| <b>OS</b>  |                              |                          |                 |
| M1a        | 91.9                         | not reached              | 1.4 (1.1, 1.8)  |
| M1b        | 76                           | 43.7                     |                 |
| M1c        | 65                           | 43.9                     |                 |
| M1d        | 64                           | 32.9                     |                 |
| <b>PFS</b> |                              |                          |                 |
| M1a        | 66.6                         | 25.5                     | 1.3 (1.0, 1.6)  |
| M1b        | 54.4                         | 23.6                     |                 |
| M1c        | 44.6                         | 9.1                      |                 |
| M1d        | 45.2                         | 8.3                      |                 |

eTable 1. Percent of patients in each AJCC 8<sup>th</sup> edition M category alive (OS) or progressed (PFS) at 1 year and median survival time in months. Royston D statistic (D-Stat) of M staging model determined at the start of immunotherapy (ICB). M1a, patients with non-regional lymph nodes and/or skin/soft tissue lesions; M1b, patients with lung metastases; M1c, patients with all other visceral sites of disease (including liver involvement); M1d, patients with CNS metastases.

**eTable 2.** Pairwise Comparisons of each AJCC Eighth Edition M category

|             | OS   |              |         | PFS  |              |         |
|-------------|------|--------------|---------|------|--------------|---------|
|             | HR   | 95% CI       | p-value | HR   | 95% CI       | p-value |
| M1a vs M1b  | 0.58 | [0.30, 1.14] | 0.11    | 0.79 | [0.46, 1.36] | 0.39    |
| M1a vs M1c  | 0.57 | [0.35, 0.95] | 0.03    | 0.66 | [0.44, 1.01] | 0.05    |
| M1a vs M1d  | 0.53 | [0.31, 0.91] | 0.02    | 0.62 | [0.40, 0.96] | 0.03    |
| M1b vs. M1c | 0.79 | [0.51, 1.22] | 0.29    | 0.79 | [0.54, 1.14] | 0.21    |
| M1b vs. M1d | 0.76 | [0.48, 1.22] | 0.26    | 0.74 | [0.50, 1.11] | 0.14    |
| M1c vs. M1d | 0.91 | [0.64, 1.30] | 0.61    | 0.92 | [0.68, 1.24] | 0.57    |

eTable 2. Pairwise comparisons of each AJCC 8<sup>th</sup> edition M category. HR, hazard ratio. CI, confidence interval. M1a, patients with non-regional lymph nodes and/or skin/soft tissue lesions; M1b, patients with lung metastases; M1c, patients with all other visceral sites of disease (including liver involvement); M1d, patients with CNS metastases.

**eTable 3.** Royston D Statistic of M Staging Models

| <b>Endpoint</b> | <b>M stage</b> | <b>Royston D-Statistic</b> | <b>95% CI</b> |
|-----------------|----------------|----------------------------|---------------|
| OS              | ICB            | 1.4                        | (1.1 ,1.8)    |
| OS              | Met Dx         | 1.3                        | (0.99 ,1.7)   |
| OS              | New            | 2.4                        | (1.8 ,3.2)    |
| PFS             | ICB            | 1.3                        | (1.0 ,1.6)    |
| PFS             | Met Dx         | 1.2                        | (0.97 ,1.5)   |
| PFS             | New            | 1.7                        | (1.3 ,2.1)    |

eTable 3. Royston D statistic of AJCC 8<sup>th</sup> edition M stage 1) determined at the start of immunotherapy (ICB), 2) at metastatic diagnosis (Met Dx), and 3) the newly proposed staging model at the start of immunotherapy (New) for both OS and PFS.

**eFigure 1. Kaplan-Meier Analysis of the OS and PFS in Patients With and Without Brain Metastases**

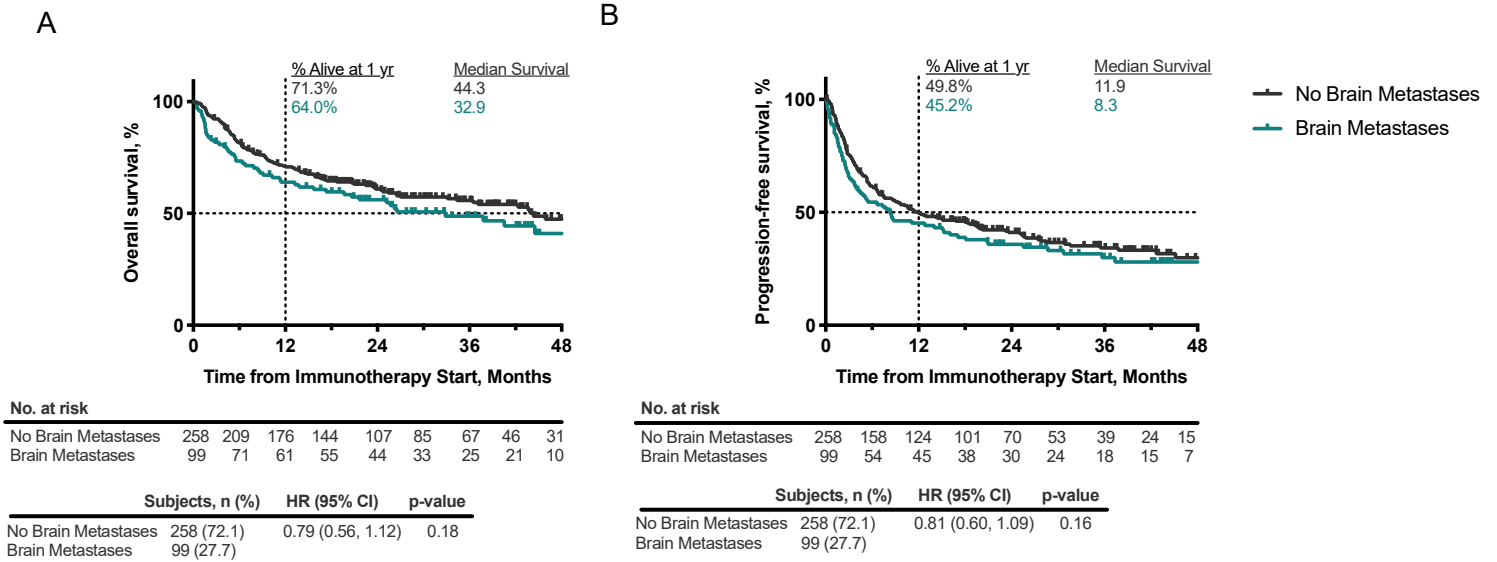

eFigure 1. Kaplan-Meier estimates of **A)** OS and **B)** PFS of patients with and without brain metastases. HR, hazard ratio; CI, confidence interval. Vertical dotted line marks 1-year survival.

**eFigure 2.** Kaplan-Meier Analysis of AJCC Eighth Edition M Category at ICI Initiation in Patients Who Received First-Line ICI

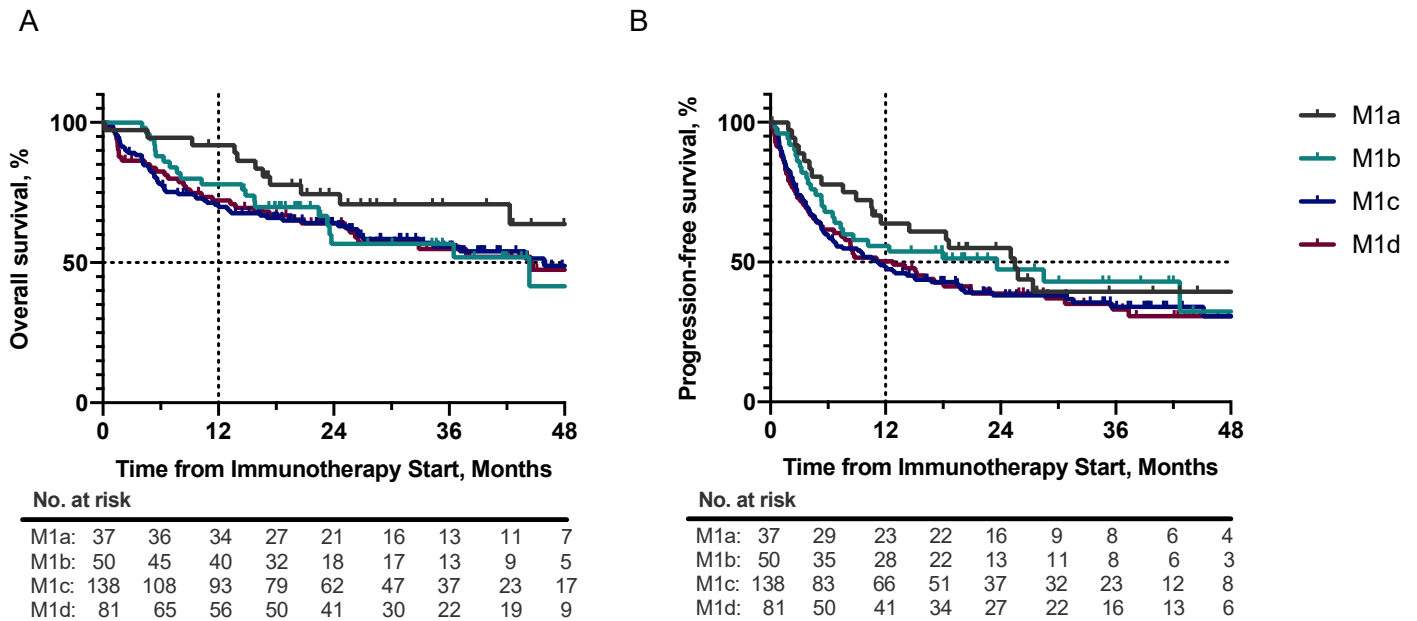

eFigure 2. Kaplan-Meier estimates of A) OS and B) PFS stratified by the AJCC 8<sup>th</sup> edition M category at ICI initiation for patients who received first line ICI. M1a, patients with non-regional lymph nodes and/or skin/soft tissue lesions; M1b, patients with lung metastases; M1c, patients with all other visceral sites of disease (including liver involvement); M1d, patients with CNS metastases. Vertical dotted line marks 1-year survival.

**eTable 4.** Pairwise Comparisons of Each AJCC Eighth Edition M Category for Patients Who Received First-Line ICI

|             | OS   |              |         | PFS  |              |         |
|-------------|------|--------------|---------|------|--------------|---------|
|             | HR   | 95% CI       | p-value | HR   | 95% CI       | p-value |
| M1a vs M1b  | 0.6  | [0.30, 1.20] | 0.15    | 0.88 | [0.49, 1.56] | 0.66    |
| M1a vs M1c  | 0.58 | [0.34, 0.99] | 0.05    | 0.72 | [0.47, 1.12] | 0.15    |
| M1a vs M1d  | 0.6  | [0.33, 1.10] | 0.1     | 0.7  | [0.43, 1.13] | 0.14    |
| M1b vs. M1c | 0.84 | [0.52, 1.35] | 0.46    | 0.78 | [0.52, 1.18] | 0.25    |
| M1b vs. M1d | 0.92 | [0.54, 1.57] | 0.75    | 0.77 | [0.50, 1.20] | 0.25    |
| M1c vs. M1d | 1.04 | [0.69, 1.56] | 0.87    | 0.97 | [0.69, 1.36] | 0.85    |

eTable 4. Pairwise comparisons of each M category for patients who received first line ICI. M1a, patients with non-regional lymph nodes and/or skin/soft tissue lesions; M1b, patients with lung metastases; M1c, patients with all other visceral sites of disease (including liver involvement); M1d, patients with CNS metastases. HR, hazard ratio. CI, confidence interval.

**eFigure 3.** Kaplan-Meier Analysis of Patient OS and PFS by *BRAF* Status

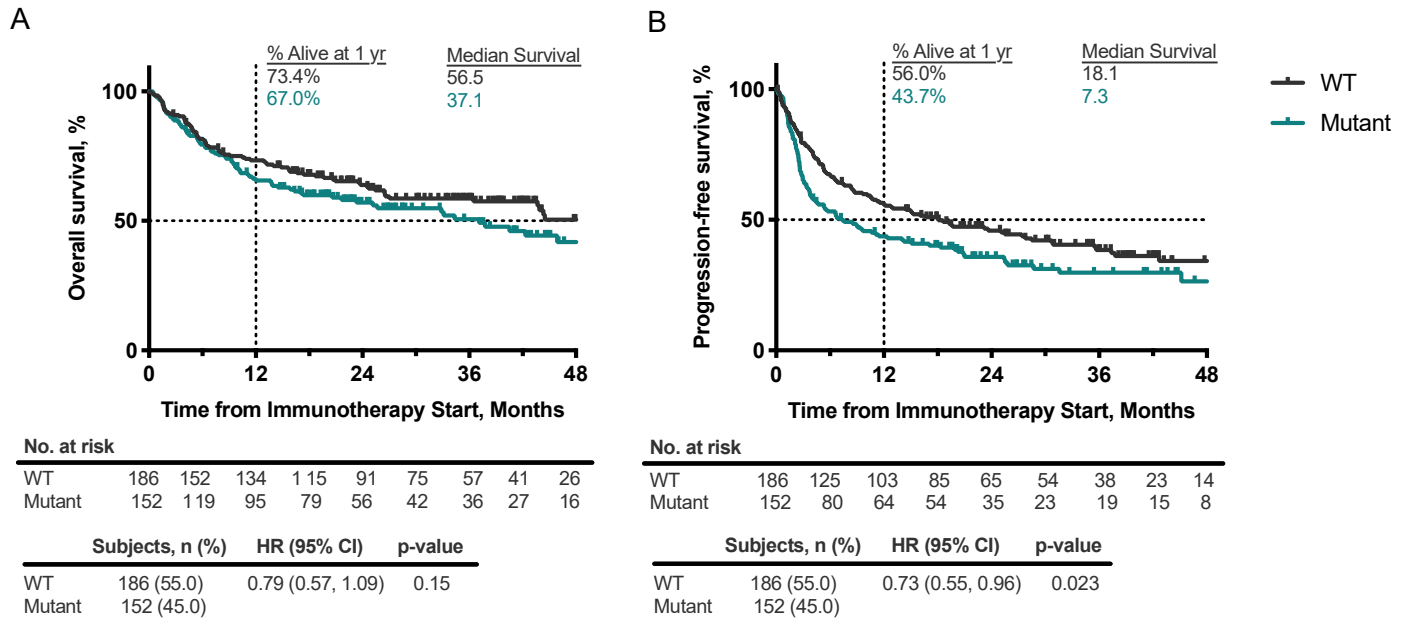

eFigure 3. Kaplan-Meier estimates of patient **A)** OS and **B)** PFS by *BRAF* mutation status. HR, hazard ratio; CI, confidence interval. Vertical dotted line marks 1-year survival.



**eFigure 4.** Kaplan-Meier Analysis Comparing the OS and PFS of Patients With and Without Liver Metastases

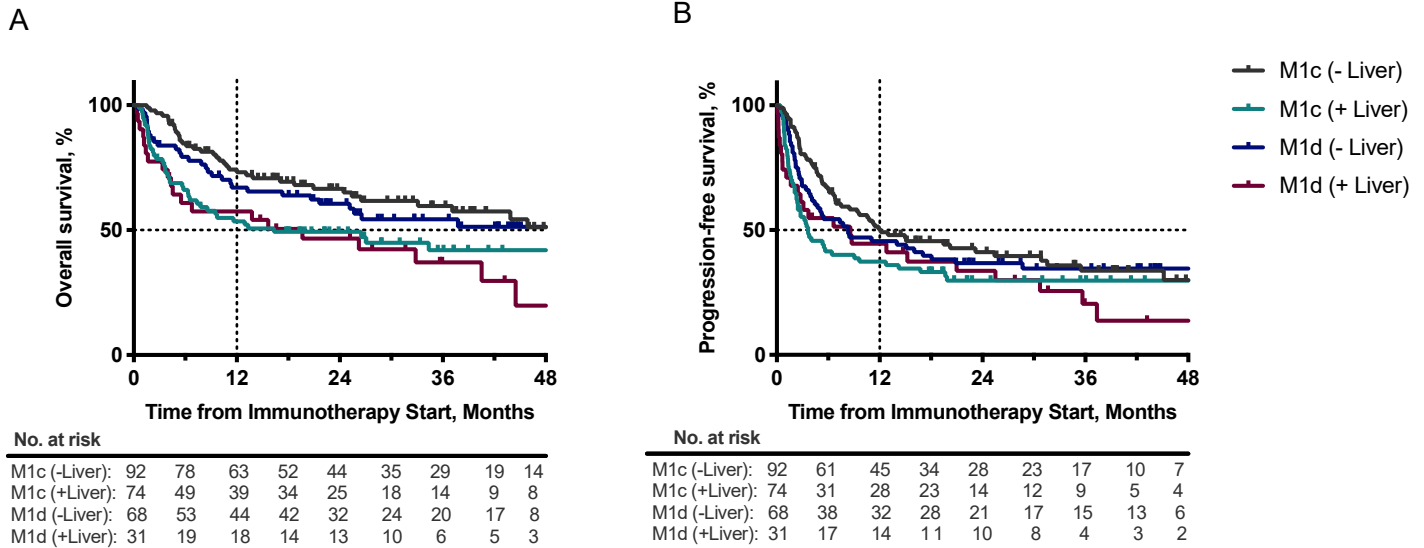

eFigure 4. Kaplan-Meier estimates of **A)** OS and **B)** PFS of M1c and M1d cutaneous melanoma patients with and without liver metastases. M1c (- Liver), patients in the M1c category without liver metastases; M1c (+Liver), patients in the M1c category with liver metastases; M1d (-Liver), patients with CNS metastases that do not have liver involvement; M1d (+ Liver), patients with both CNS and liver metastases; HR, hazard ratio; CI, confidence interval. Vertical dotted line marks 1-year survival.

**eTable 5.** OS and PFS Measures for Patients With M1c and M1d Disease With and Without Liver Metastases

|               | <b>Subjects alive at 1 year (%)</b> | <b>Median Survival (months)</b> |
|---------------|-------------------------------------|---------------------------------|
| <b>OS</b>     |                                     |                                 |
| M1c (-Liver)  | 73.1                                | 56.5                            |
| M1c (+Liver)  | 54.9                                | 16.3                            |
| M1d (-Liver)  | 66.9                                | 62.0                            |
| M1d (+ Liver) | 57.5                                | 19.6                            |
| <b>PFS</b>    |                                     |                                 |
| M1c (-Liver)  | 50.3                                | 12.1                            |
| M1c (+Liver)  | 37.4                                | 3.7                             |
| M1d (-Liver)  | 45.6                                | 8.3                             |
| M1d (+ Liver) | 44.6                                | 8.6                             |

Extended Table 5. Percent of M1c or M1d patients with and without liver metastases alive (OS) or progressed (PFS) at 1 year and median survival time in months. M1c (- Liver), patients in the M1c category without liver metastases; M1c (+Liver), patients in the M1c category with liver metastases; M1d (-Liver), patients with CNS metastases that do not have liver involvement; M1d (+ Liver), patients with both CNS and liver metastases

**eTable 6.** Pairwise Comparisons of Patients With M1c and M1d Disease With and Without Liver Metastases

|                                | OS   |             |         | PFS  |             |         |
|--------------------------------|------|-------------|---------|------|-------------|---------|
|                                | HR   | 95% CI      | p-value | HR   | 95% CI      | p-value |
| M1c (-Liver) vs M1c (+Liver)   | 0.52 | [0.33-0.82] | 0.0043  | 0.64 | [0.43-0.95] | 0.025   |
| M1c (- Liver) vs M1d (-Liver)  | 0.86 | [0.52-1.36] | 0.47    | 0.83 | [0.56-1.23] | 0.36    |
| M1c (+ Liver) vs M1d (- Liver) | 1.54 | [0.97-2.45] | 0.065   | 1.28 | [0.86-1.91] | 0.23    |
| M1c (+Liver) vs M1d (+ Liver)  | 0.81 | [0.47-1.43] | 0.46    | 0.92 | [0.56-1.51] | 0.74    |
| M1d (+Liver) vs M1d (-Liver)   | 0.53 | [0.28-0.99] | 0.045   | 0.71 | [0.42-1.21] | 0.21    |

Extended Table 6. Pairwise comparisons of M1c and M1d patients with and without liver metastases. M1c (-Liver), patients in the M1c category without liver metastases; M1c (+Liver), patients in the M1c category with liver metastases; M1d (-Liver), patients with CNS metastases that do not have liver involvement; M1d (+ Liver), patients with both CNS and liver metastases; HR, hazard ratio. CI, confidence interval.

**eFigure 5.** Comparison of Number of Metastatic Sites and LDH Level

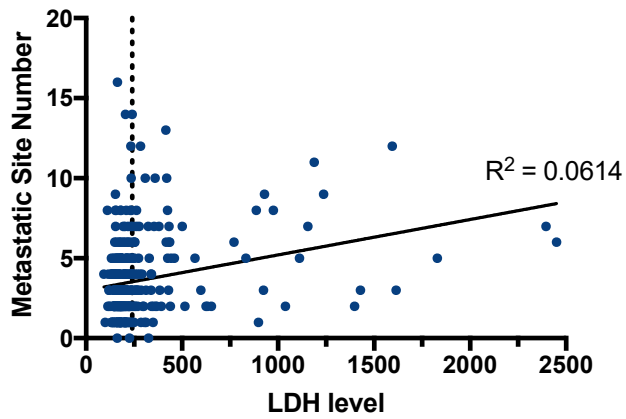

eFigure 5. Scatter plot of metastatic site number by LDH level. Dotted line is at 240 IU/L which is the upper limit of normal.

**eTable 7.** Pairwise Univariable Analysis of LDH Stratified by Liver Involvement

| LDH at Metastatic Diagnosis | Presence of Liver Metastases | OS (months)      |         | PFS (months)     |         |
|-----------------------------|------------------------------|------------------|---------|------------------|---------|
|                             |                              | HR [95% CI]      | p-value | HR [95% CI]      | p-value |
| WNL                         | No                           | 0.65 [0.39-1.10] | 0.096   | 0.77 [0.51-1.18] | 0.23    |
|                             | Yes                          |                  |         |                  |         |
| Elevated (> 240 IU/L)       | No                           | 0.42 [0.24-0.71] | 0.0014  | 0.56 [0.34-0.92] | 0.021   |
|                             | Yes                          |                  |         |                  |         |
| WNL                         | No                           | 0.56 [0.33-0.95] | 0.032   | 0.79 [0.52-1.21] | 0.28    |
| Elevated                    |                              |                  |         |                  |         |
| WNL                         | Yes                          | 0.32 [0.18-0.56] | <0.0001 | 0.56 [0.34-0.91] | 0.020   |
| Elevated                    |                              |                  |         |                  |         |

eTable 7. Pairwise comparisons of LDH level stratified by liver involvement. LDH, lactate dehydrogenase; WNL, within normal limits,  $\leq 240$  IU/L, elevated,  $>240$  IU/L; HR, hazard ratio; CI, confidence interval.

**eTable 8.** OS and PFS Measures of Patients in the Proposed Staging Model

|                           | <b>Subjects<br/>alive at 1<br/>year (%)</b> | <b>Median<br/>Survival<br/>(months)</b> |
|---------------------------|---------------------------------------------|-----------------------------------------|
| <b>OS</b>                 |                                             |                                         |
| -Liver, LDH (WNL)         | 79.8                                        | 56.5                                    |
| +Liver OR LDH (Elevated)  | 63.6                                        | 34.4                                    |
| +Liver AND LDH (Elevated) | 34.7                                        | 4.2                                     |
| <b>PFS</b>                |                                             |                                         |
| -Liver, LDH (WNL)         | 55.0                                        | 18                                      |
| +Liver OR LDH (Elevated)  | 43.7                                        | 8.5                                     |
| +Liver AND LDH (Elevated) | 33.2                                        | 2.1                                     |

eTable 8. Percent of patients alive at 1 year and median survival in each stratum of the new staging model. - Liver, all patients without liver metastases; + Liver, all patients with liver metastases; LDH, lactate dehydrogenase; WNL, within normal limits,  $\leq 240$  IU/L, elevated,  $>240$  IU/L.

**eTable 9.** Pairwise Comparisons of Each Stratum in the Proposed Staging Model of Patients With Metastatic Cutaneous Melanoma

|                                                       | OS   |              |         | PFS  |             |         |
|-------------------------------------------------------|------|--------------|---------|------|-------------|---------|
|                                                       | HR   | 95% CI       | p-value | HR   | 95% CI      | p-value |
| +Liver OR LDH (Elevated) vs -Liver, LDH (WNL)         | 1.79 | [1.19-2.67]  | 0.0049  | 1.32 | [0.95-1.85] | 0.10    |
| +Liver AND LDH (Elevated) vs -Liver, LDH (WNL)        | 9.98 | [5.30-18.77] | <0.0001 | 3.19 | [1.93-5.26] | <0.0001 |
| +Liver AND LDH (Elevated) vs +Liver OR LDH (Elevated) | 3.01 | [1.77-5.12]  | <0.0001 | 1.85 | [1.16-2.96] | 0.0095  |

eTable 9. Pairwise comparisons of each stratum. 1) patients with normal LDH levels and no liver metastases (-Liver); 2), patients with either elevated LDH OR liver metastases (+Liver); 3), patients with both elevated LDH and liver metastases. - Liver, all patients without liver metastases; + Liver, all patients with liver metastases; LDH, lactate dehydrogenase; WNL, within normal limits,  $\leq 240$  IU/l, High,  $>240$  IU/L; CI, confidence interval.

**eFigure 6.** Kaplan-Meier Analysis of Progression-Free Survival of the Proposed Staging Model of Patients With Metastatic Cutaneous Melanoma Incorporating LDH Levels and Liver Involvement

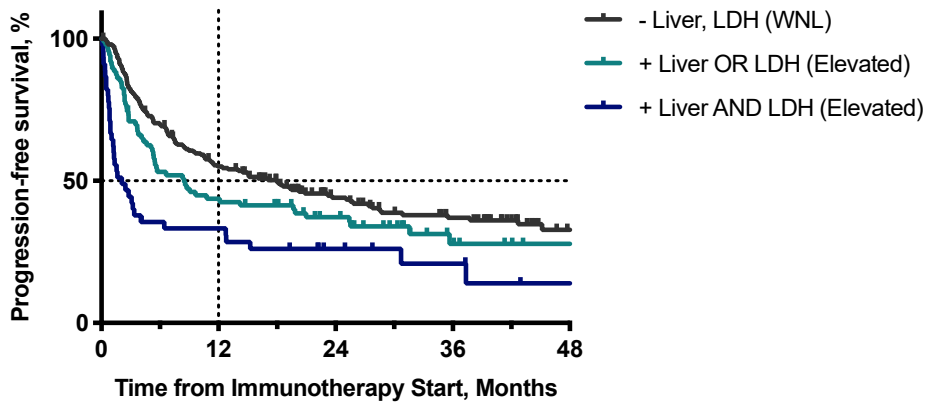

**No. at risk**

|                            |     |     |     |    |    |    |    |    |    |
|----------------------------|-----|-----|-----|----|----|----|----|----|----|
| -Liver, LDH (WNL):         | 203 | 141 | 108 | 87 | 62 | 49 | 41 | 29 | 16 |
| +Liver OR LDH (Elevated):  | 86  | 46  | 38  | 33 | 25 | 17 | 9  | 6  | 4  |
| +Liver AND LDH (Elevated): | 45  | 16  | 15  | 12 | 8  | 6  | 5  | 3  | 2  |

eFigure 6. Kaplan-Meier estimates of patient PFS using the proposed staging system for metastatic melanoma. LDH, lactate dehydrogenase; WNL, within normal limits,  $\leq 240$  IU/l, High,  $>240$  IU/L; - Liver, all patients without liver metastases; + Liver, all patients with liver metastases; CI, confidence interval; vertical dotted line marks 1-year survival.



**eTable 10.** Clinical and Disease Characteristics of External Validation Cohort

|  | <b>Factor</b>                         | <b>n (%)</b> |  |
|--|---------------------------------------|--------------|--|
|  | <b>Overall (n = 652)</b>              |              |  |
|  | <b>Age at ICB Start</b>               |              |  |
|  | Mean (SD)                             | 67.9 (11.6)  |  |
|  | Median (IQR)                          | 68.6 (5.3)   |  |
|  | <b>Gender</b>                         |              |  |
|  | Female                                | 22 (3.4)     |  |
|  | Male                                  | 630 (96.6)   |  |
|  | <b>BRAF</b>                           |              |  |
|  | WT                                    | 256 (39.3)   |  |
|  | MT                                    | 179 (27.5)   |  |
|  | Unknown                               | 217 (33.2)   |  |
|  | <b>ECOG</b>                           |              |  |
|  | 0                                     | 178 (27.3)   |  |
|  | 1                                     | 85 (13.0)    |  |
|  | 2+                                    | 17 (2.6)     |  |
|  | Unknown                               | 372 (57.1)   |  |
|  | <b>ICB Type</b>                       |              |  |
|  | Dual Agent (Ipilimumab,<br>Nivolumab) | 89 (13.7)    |  |
|  | Single Agent                          | 563 (86.3)   |  |
|  | <b>Presence of Liver Metastases</b>   |              |  |
|  | No                                    | 503 (77.1)   |  |
|  | Yes                                   | 149 (22.9)   |  |
|  | <b>LDH</b>                            |              |  |
|  | Elevated                              | 203 (31.1)   |  |
|  | WNL                                   | 449 (68.9)   |  |
|  |                                       |              |  |

**eTable 11.** OS Measures of External Validation Cohort

|                           | <b>Subjects alive at<br/>1 year (%)</b> | <b>Median Survival<br/>(months)</b> |
|---------------------------|-----------------------------------------|-------------------------------------|
| -Liver, LDH (WNL)         | 70.1                                    | 30.7                                |
| +Liver OR LDH (Elevated)  | 50.6                                    | 12.4                                |
| +Liver AND LDH (Elevated) | 16.9                                    | 2.5                                 |

eTable 11. OS measures of external validation cohort. - Liver, all patients without liver metastases; + Liver, all patients with liver metastases LDH, lactate dehydrogenase; WNL, within normal limits.

**eTable 12.** Pairwise Comparisons of Each Stratum in the New Staging Model Using an External Validation Cohort

|                                                       | OS    |               |         |
|-------------------------------------------------------|-------|---------------|---------|
|                                                       | HR    | 95% CI        | p-value |
| +Liver OR LDH (Elevated) vs -Liver, LDH (WNL)         | 1.77  | [1.40-2.24]   | <0.0001 |
| +Liver AND LDH (Elevated) vs -Liver, LDH (WNL)        | 37.65 | [22.69-62.46] | <0.0001 |
| +Liver AND LDH (Elevated) vs +Liver OR LDH (Elevated) | 3.96  | [2.72-5.78]   | <0.0001 |

eTable 12. Pairwise comparisons of each stratum using a validation cohort. - Liver, all patients without liver metastases; + Liver, all patients with liver metastases; LDH, lactate dehydrogenase; WNL, within normal limits; HR, hazard ratio; CI, confidence interval.
